# Supplementary material for: Presolvated electron reactivity towards CO2 and N2O in water
Source: Royal Society of Chemistry journal article supplement (doi:10.1039/d1cp00373a), 2021-01-01
Supplement: d1cp00373a1.pdf [file d1cp00373a1.pdf]

**Supporting Information:**  
**Presolvated electron reactivity towards CO<sub>2</sub>,  
N<sub>2</sub>O in the water**

Sergey A. Denisov\* and Mehran Mostafavi

*Institute de Chimie Physique UMR 8000, CNRS/Université Paris-Saclay, Bâtiment 349,  
Orsay, 91405, France*

E-mail: [sergey.denisov@universite-paris-saclay.fr](mailto:sergey.denisov@universite-paris-saclay.fr)

Phone: +33169156171. Fax: +33169156188

## Pressurized optical cell

The schematic representation of the experimental layout is presented in Figure SS1. The system consists of a closed water loop. The circulation of solutions, to guarantee refreshment of solution in measurement volume, was achieved using home made pump driven by electromagnets. The principle of action follows the sequence: 1) the current is applied to the electromagnets (1 and 2), working in the opposite direction: electromagnet 1 is pushing, while 2 is pulling the permanent magnets fixed on the piston; 2) once the piston is displaced, the current in electromagnets is reversed, and the piston goes down. The flow of solution during reverse movement of the piston is not affected since the lock-balls are released, letting the solution flow through the six holes in the piston.

The spectroscopic cell fracture test with Ar guaranteed the safe pressure to operate below 75 bar with 1 mm input window and 5 mm output one, respectively. The pressure was controlled by a gas pressure regulator (0-100 bar, Swagelok) directly attached to a gas cylinder.

Once the pressure of the gas was applied using (valve 3), the equilibration for 30 minutes were undertaken. To intensify a gas exchange, a bubble of gas was formed over the water to increase the surface area for an exchange. Each measurement with a different pressure was conducted with a freshwater volume (1.5 mL) pumped into the cell.

The filling of the closed water circuit was accomplished by a peristaltic pump (valve 1, 2); after that, the system was isolated and pressurized to a given pressure.

## $H^+$ and carbonate ions concentration calculation

Based on  $CO_2$  water chemistry (eq. 1a) it is possible to calculate (eq. 2a) the pH of  $CO_2$  water solution at different  $CO_2$  pressures (Figure S2A), the fraction of carbonates and  $CO_{2aq}$  (Figure S2B).

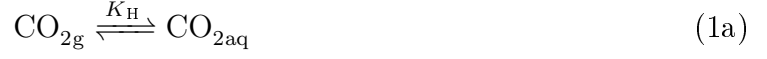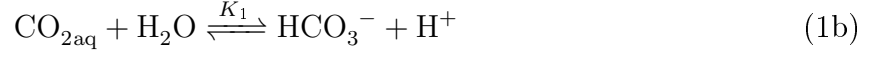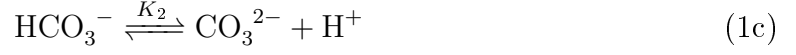

$$[\text{OH}^-] = \frac{K_W}{[\text{H}^+]} \quad (2\text{a})$$

$$K_W = 10^{-14}$$

$$[\text{HCO}_3^-] = \frac{K_1[\text{H}_2\text{CO}_3]}{[\text{H}^+]} \quad (2\text{b})$$

$$[\text{CO}_3^{2-}] = \frac{K_2[\text{HCO}_3^-]}{[\text{H}^+]} \quad (2\text{c})$$

Substituting for  $[\text{HCO}_3^-]$

$$[\text{CO}_3^{2-}] = \frac{K_1 K_2 [\text{H}_2\text{CO}_3]}{[\text{H}^+]^2} \quad (2\text{d})$$

The rewritten electrical neutrality expression  $[\text{H}^+] = [\text{OH}^-] + [\text{HCO}_3^-] + 2[\text{CO}_3^{2-}]$  in terms of  $[\text{H}^+]$ :

$$[\text{H}^+] = \frac{K_W}{[\text{H}^+]} + \frac{K_1[\text{H}_2\text{CO}_3]}{[\text{H}^+]} + 2 \frac{K_1 K_2 [\text{H}_2\text{CO}_3]}{[\text{H}^+]^2} \quad (2\text{e})$$

rearranging and substituting  $[\text{H}^+] = x$  and  $[\text{H}_2\text{CO}_3] = k_H P_{\text{CO}_2}$  gives:

$$x^3 - x \cdot (K_W + K_1 K_H P_{\text{CO}_2}) - 2 K_1 K_2 K_H P_{\text{CO}_2} = 0 \quad (2\text{f})$$

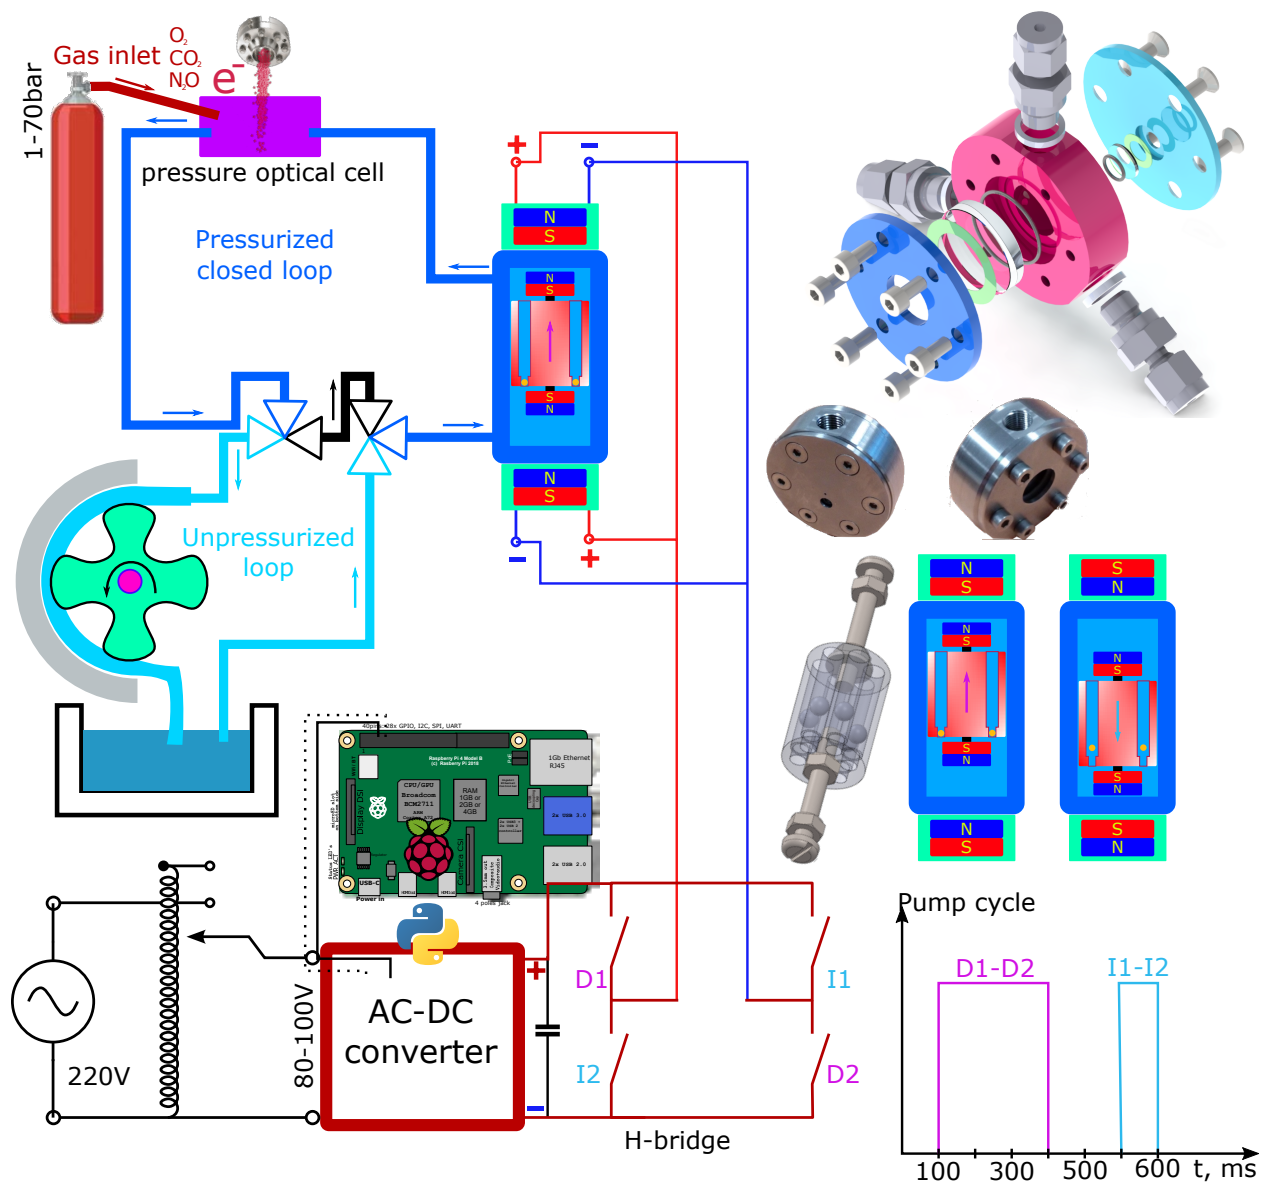

Figure S1: The schematic representation of the experiment, including the pressurized cell blueprint and its 3D model.

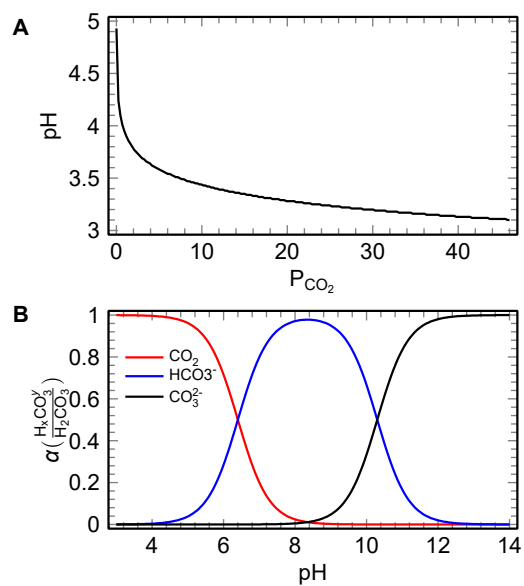

Figure S2: Calculated parameters (eq. 2): A. pH of a solution as a function of CO<sub>2</sub> pressure, B. the fraction of different forms of carbonates in the water-CO<sub>2</sub> solution 1 atm of CO<sub>2</sub>.
